# Supplementary material for: Artificial Neural Network Modeling of Novel Coronavirus (COVID-19) Incidence Rates across the Continental United States
Source: PubMed Central journal article supplement (PMC7344609; doi:10.3390/ijerph17124204), 2020-06-12
Supplement: ijerph-17-04204-s001.pdf [file ijerph-17-04204-s001.pdf]

All variables and **selected variables** after feature selection:

|                                          |                                                   |
|------------------------------------------|---------------------------------------------------|
| Dependent variable: COVID-19 incidence   | Total number of specialists                       |
| Median Household Income                  | Total number of nurse practitioners               |
| Income Inequality                        | Total number of physician assistants              |
| Uninsured                                | Total number of hospitals                         |
| Unemployment rate                        | Cardiovascular disease                            |
| Food Insecurity                          | Cerebrovascular disease                           |
| Fair or poor health                      | Hypertensive heart disease                        |
| Adult Smoking                            | Cardiomyopathy and myocarditis                    |
| Road Density                             | Atrial fibrillation                               |
| Particulate matter 2.5 (Min, Max, mean)  | Peripheral vascular disease                       |
| Air quality index (AQI) (Min, Max, mean) | Pancreatic                                        |
| Temperature (Min, Max, mean)             | Mesothelioma                                      |
| Precipitation                            | Hodgkin lymphoma                                  |
| Elevation (Min, Max, Mean)               | Leukemia                                          |
| Maximum terrain slope                    | Tracheal, bronchus, and lung                      |
| Percent of 65 years and over             | Drug use disorder                                 |
| Percent of Asian                         | Alcohol use disorder                              |
| Percent of Hispanic                      | COPD                                              |
| The proportion of African American       | Asthma                                            |
| Percent of black males                   | Interstitial lung disease & pulmonary sarcoidosis |
| Percent of black females                 | Tuberculosis                                      |
| Percent of white males                   | HIV/AIDS                                          |
| Percent of white females                 | Hepatitis                                         |
| Net International migration rate         | Lower respiratory infection                       |
| Total number of primary care physicians  | Ischemia                                          |
